# Supplementary material for: Prognostic Impact of CEACAM1 in Node-Negative Ovarian Cancer Patients
Source: Dis Markers. 2018 Jun 28;2018:6714287. doi: 10.1155/2018/6714287 (PMC6046165; doi:10.1155/2018/6714287)
Supplement: Supplementary Materials — Table S1: cohort of ovarian cancer patients used for Western blot analysis. Table S2: TCGA cohort (n = 517) used for analysis of mRNA data. Table S3: correlations of CEACAM1 mRNA levels with clinical and histological tumour parameters. [file 6714287.f1.xlsx]

## Sheet: Table S1
Table S1: Cohort of ovarian cancer patients used for Western blot analysis
Primary tumours (n=210)		n(%)1
FIGO stage	I	7 (3.3)
	II	7 (3.3)
	III	148 (70.5)
	IV	39 (18.6)
Grading	G1	11 (5.2)
	G2	44 (21.0)
	G3	149 (71.0)
Nodal involvement	N0	49 (23.3)
	N1	124 (59.0)
Distant metastasis	M0	142 (67.6)
	M1	43 (20.5)
Histological type	serous	177 (84.3)
	others	28 (13.3)
Residual tumour after	no macroscopic tumour	138 (65.7)
surgery	< 1 cm	38 (18.1)
	> 1 cm	24 (11.4)
Chemotherapy	C/P	133 (62.7)
	C/P + Bevazizumab	7 (3.3)
	C/P + Epirubicin	4 (1.9)
	C/Cyclophosphamid	3 (1.4)
	C/P + AMG479	4 (2.4)
	C mono	7 ()
	others	7 (3.3)
	no chemotherapy	11 (5.2)
benign cystadenoma		4
borderline tumour		16
recurrent carcinoma		12
1, missing cases to n=210/100%: unknown; C, carboplatin; P, paclitaxel

## Sheet: Table S2
Table S2: TCGA cohort (n=517) used for analysis of RNA data		n=	%
Race	white	458	(88.6)
	black	23	(4.4)
	asian	15	(2.9)
	others	3	(0.6)
	n.a.	18	(3.5)
Stage	Ia-Ic	15	(2.9)
	IIa-IIc	25	(4.8)
	IIIa	7	(1.4)
	IIIb	22	(4.3)
	IIIc	364	(70.4)
	IV	80	(15.5)
	n.a.	4	(0.8)
Grading	G1	5	(1.0)
	G2	64	(12.4)
	G3/G4	437	(84.5)
	GX	8	(1.5)
	n.a.	3	(0.6)
Residual disease	no macroscopic disease	102	(19.7)
	1-10 mm	233	(45.1)
	11-20 mm	32	(6.2)
	> 20 mm	92	(17.8)
	n.a.	58	(11.2)
Vascular invasion	yes	78	(15.1)
	no	68	(13.2)
	n.a.	371	(71.8)
Lymphovascular invasion	yes	120	(23.2)
	no	75	(14.5)
	n.a.	322	(62.3)
Pharmaceutical adjuvant Tx	yes	475	(91.9)
	no	26	(5.0)
	n.a.	16	(3.1)
Treatment outcome first course	complete remission	300	(58.0)
	partial remission	59	(11.4)
	stable disease	26	(5.0)
	progressive disease	37	(7.2)
	n.a.	95	(18.4)
Vital status	alive	195	(37.7)
	dead	322	(62.3)
Mean age (years)		59.8
Time to death (days)		1175
Time to last contact (days)		1188
n.a.: data not available

## Sheet: Table S3
Table S3: Correlations of CEACAM1 mRNA levels with clinical and histological tumour parameters (n=517)1
		low CEACAM1 RNA levels	high CEACAM1 RNA levels
		< median	> median	p=
Age at diagnosis	</= 59 y	125	144
	> 59 y	134	114	0.086
Clinical stage	stage I/II	16	24
	stage III	213	180
	stage IV	29	51	0.0062
Grading	G1-2	38	31
	G3-4	215	222	0.365
Vascular invasion	V1	36	42
	V0	37	31	0.320
Lymphovascular invasion	L1	56	64
	L0	44	31	0.103
Residual tumour after surgery	no macr. tumour	55	47
	1-10 mm	123	110
	11-20 mm	14	18
	> 20 mm	43	49	0.576
1,missing cases to n=517: no information; 2, no linear association
